# Supplementary material for: 9031 ル・コルビュジエの建築作品における庭の形式(建築史・建築意匠・建築論)
Source: Royal Society of Chemistry journal article supplement (doi:10.1039/d3na00299c), 2007-05-22
Supplement: d3na00299c1.pdf [file d3na00299c1.pdf]

**Supplement for**  
**Effect of Ti and Au buffer layers on controlling the density and wettability of well-aligned**  
**ZnO nanorod arrays grown on different substrates**

**by**

**M. Kamruzzaman<sup>1\*</sup> and J. A. Zapien<sup>2\*</sup>**

<sup>1\*</sup>Department of Physics Begum Rokeya University, Rangpur, Rangpur-5400, Bangladesh

<sup>2\*</sup>Department of Materials Science and Engineering, Center Of Super-Diamond and Advanced Films (COSDAF), City University of Hong Kong, Hong Kong SAR, P. R. China.

Email: [kzaman.phy11@gmail.com](mailto:kzaman.phy11@gmail.com) (Tel: +880-1771034439), [apjzs@cityu.edu.hk](mailto:apjzs@cityu.edu.hk)  
(Tel: +852-3442-7823).

Figures S1 and S2 presented the side views FE-SEM of ZnO nanorod arrays grown on modified bare AZO, AZO/ZnO, FTO/ZnO and ITO/ZnO substrates using Ti and Au buffer layers. Inset Figures S1 and S2 also include the corresponding digital images used for the contact angle measurements. It is seen that the morphology, arrays density and hence the wettability changed as function of buffer layers thickness. The maximum contact angle is obtained for the lowest NR arrays density.

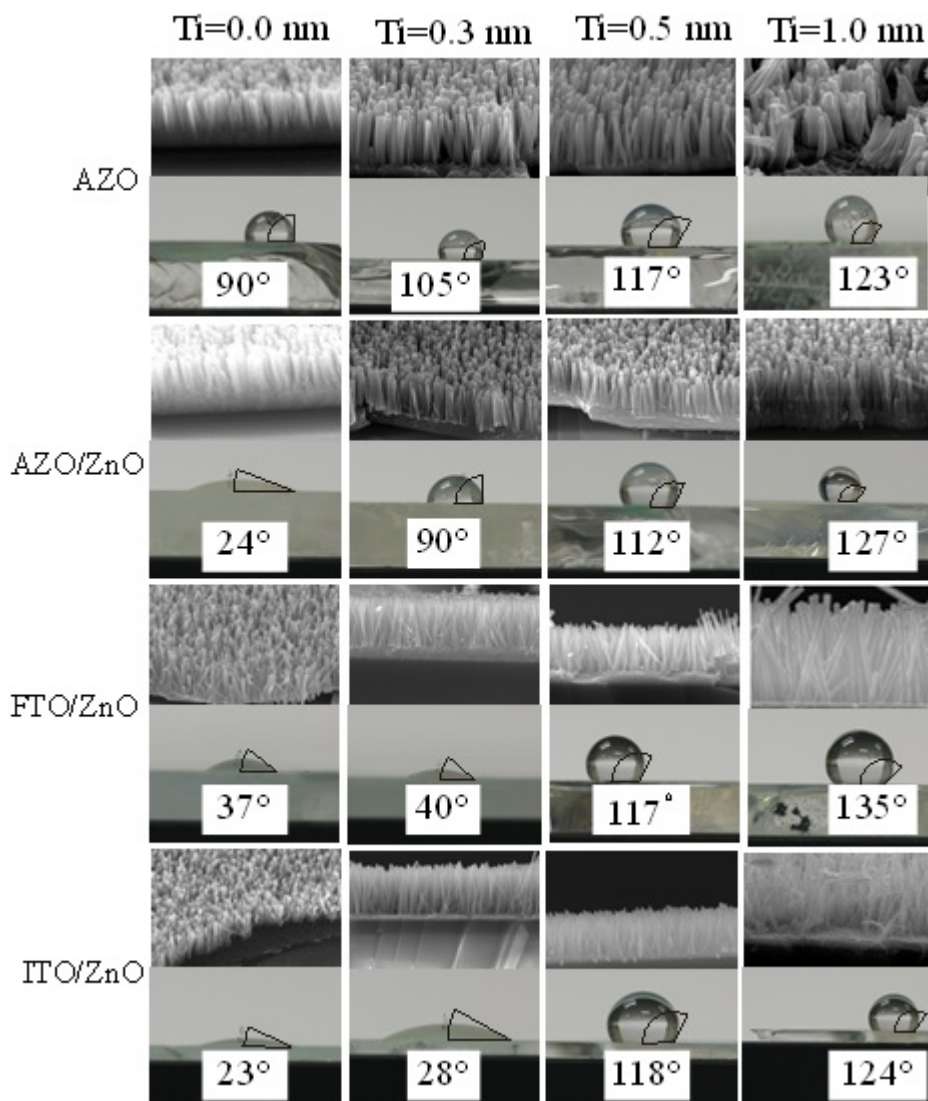

**Figure S1** Side-view FE-SEM images of ZnO NRAs on bare AZO (1<sup>st</sup> row), AZO/ZnO (2<sup>nd</sup> row), FTO/ZnO (3<sup>rd</sup> row) and ITO/ZnO (4<sup>th</sup> row) for the Ti buffer layer of different thickness, presented in each column, for the control data (no-Ti buffer, 0.0 nm Ti, in the left-most column) and increasing Ti buffer layer thickness of columns 2 to 4 corresponding to the Ti thickness of 0.3, 0.5, and 1.0 nm, respectively. The corresponding below rows represent the digital image used in the static contact angle measurements.

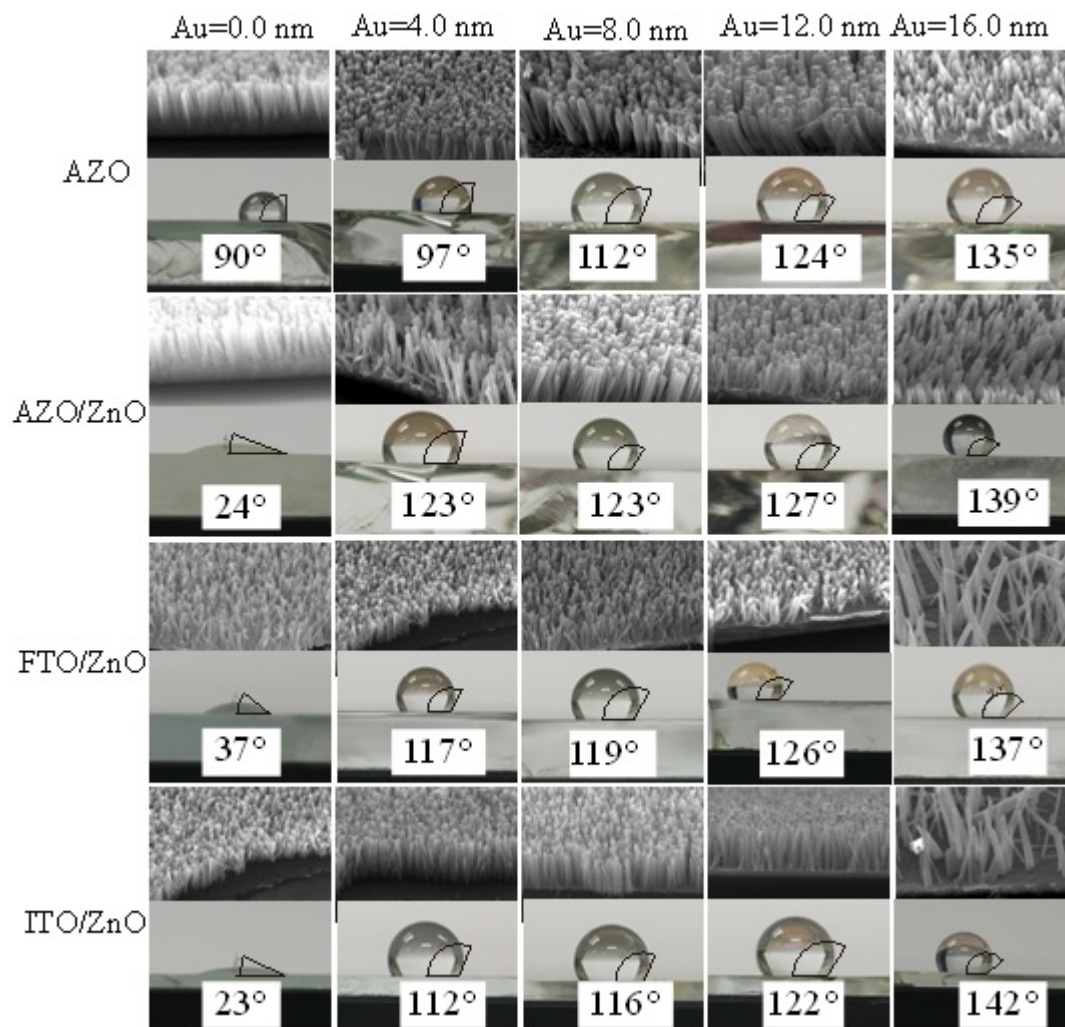

**Figure S2** Side-view FE-SEM images of ZnO NRAs on bare AZO (1<sup>st</sup> row), AZO/ZnO (2<sup>nd</sup> row), FTO/ZnO (3<sup>rd</sup> row), and ITO/ZnO (4<sup>th</sup> row) for the Au buffer layer of different thickness, presented in each column for the control data (no -Au buffer, 0.0 nm Au, in the left-most column) and increasing Au buffer layer thickness of columns 2 to 5 corresponding to the Au thickness of 4.0, 8.0, 12.0, and 16.0 nm, respectively. The corresponding below rows represent the digital image used in the static contact angle measurements.

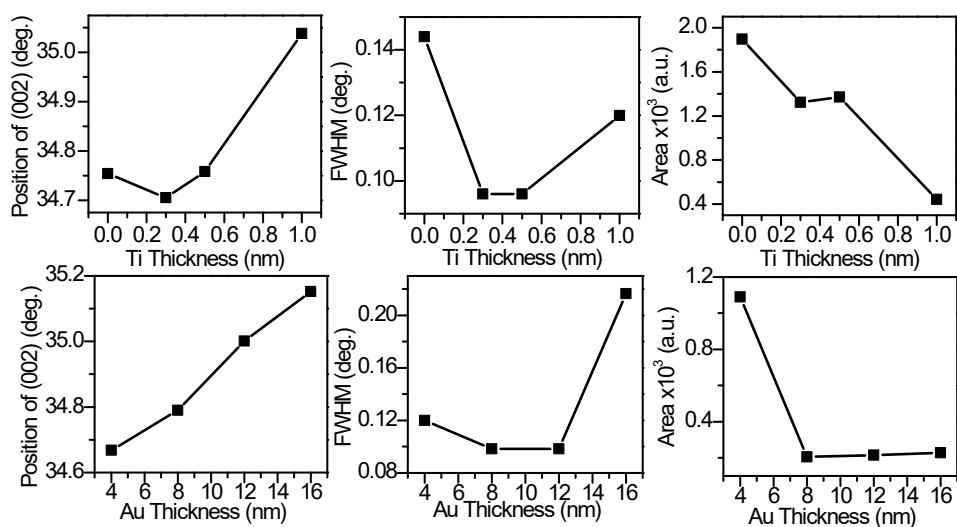

**Figure S3** Variation of the (002) peak position, FWHM and integrated intensity with the increase of Ti (top row) and Au (below row) thickness for FTO/ZnO substrate, respectively.

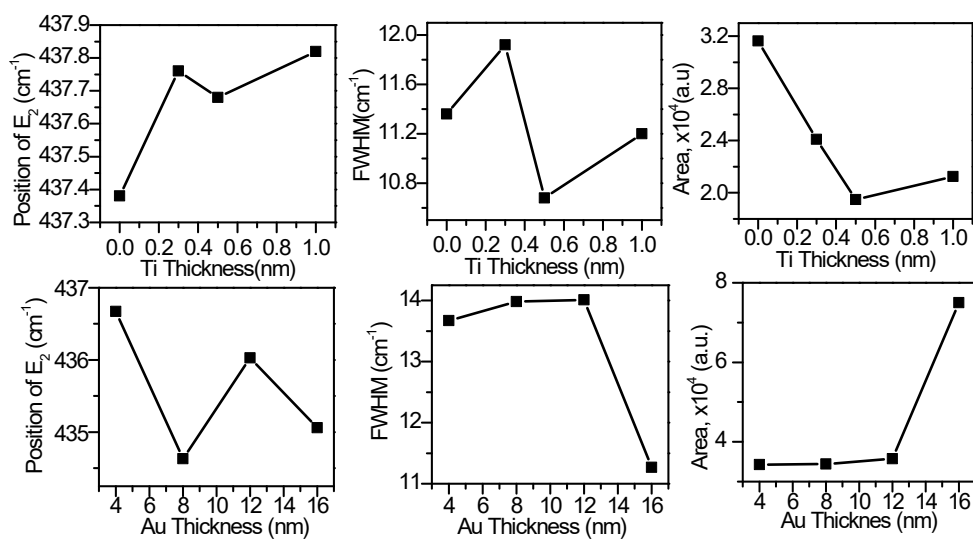

**Figure S4** Variation of the E2 (high) band position, FWHM and integrated intensity with the increase of Ti (top row) and Au (below row) thickness for FTO/ZnO substrate, respectively.

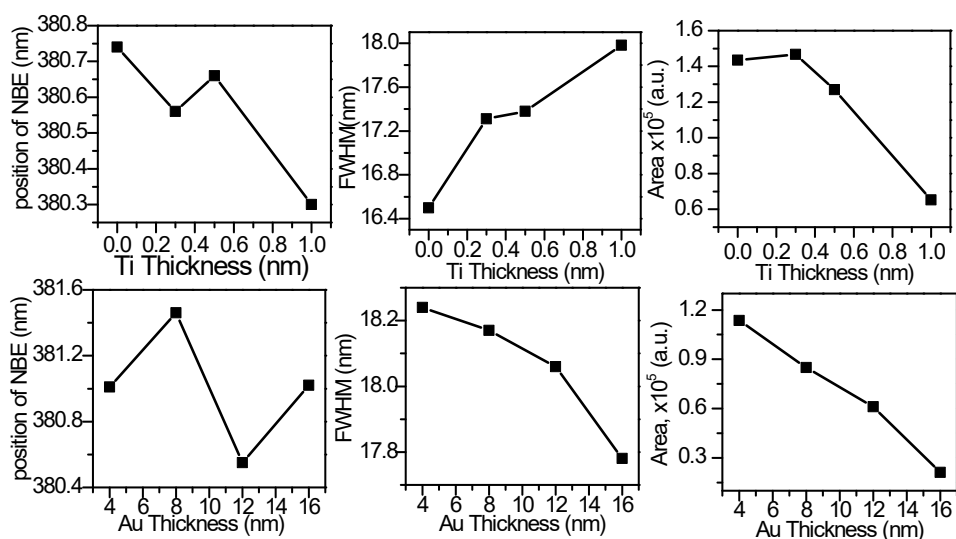

**Figure 5S** Variation of the NBE peak position, FWHM and integrated intensity with the increase of Ti (top row) and Au (below row) thickness for FTO/ZnO substrate, respectively.

**Table S1.** Variation of different parameters of ZnO NR arrays density control with Ti film thickness.

| Substrate | Seed on substrate | Ti thickness (nm)<br>(control data) | Average diameter (nm) | NRs Length ( $\mu\text{m}$ ) | NRs density ( $\mu\text{m}^{-2}$ ) | Contact angle (degree) |
|-----------|-------------------|-------------------------------------|-----------------------|------------------------------|------------------------------------|------------------------|
| AZO       | No seed           | 0.0                                 | 153                   | 0.88                         | 28                                 | 90.00                  |
|           |                   | 0.3                                 | 128                   | 1.53                         | 24                                 | 105.57                 |
|           |                   | 0.5                                 | 136                   | 1.48                         | 17                                 | 117.26                 |
|           |                   | 1.0                                 | 155                   | 1.42                         | 9                                  | 123.23                 |
| AZO       | ZnO               | 0.0                                 | 96                    | 1.10                         | 43                                 | 24.49                  |
|           |                   | 0.3                                 | 99                    | 1.13                         | 38                                 | 90.00                  |
|           |                   | 0.5                                 | 108                   | 0.96                         | 35                                 | 113.42                 |
|           |                   | 1.0                                 | 121                   | 0.78                         | 28                                 | 127.82                 |
| FTO       | ZnO               | 0.0                                 | 62                    | 1.20                         | 100                                | 37.09                  |
|           |                   | 0.3                                 | 76                    | 1.45                         | 48                                 | 40.91                  |
|           |                   | 0.5                                 | 79                    | 1.52                         | 48                                 | 117.53                 |
|           |                   | 1.0                                 | 135                   | 3.67                         | 15                                 | 135.0                  |
| ITO       | ZnO               | 0.0                                 | 70                    | 1.27                         | 75                                 | 23.86                  |
|           |                   | 0.3                                 | 90                    | 1.40                         | 50                                 | 28.07                  |
|           |                   | 0.5                                 | 97                    | 1.53                         | 46                                 | 118.18                 |
|           |                   | 1.0                                 | 103                   | 1.66                         | 38                                 | 124.40                 |

**Table S2:** Variation of different parameters of ZnO NR arrays density control with Au film thickness.

| Substrate | Seed on substrate | Au thickness (nm) (control data) | Average diameter (nm) | NRs Length ( $\mu\text{m}$ ) | NRs density ( $\mu\text{m}^{-2}$ ) | Contact angle (degree) |
|-----------|-------------------|----------------------------------|-----------------------|------------------------------|------------------------------------|------------------------|
| AZO       | No seed           | 0                                | 153                   | 0.88                         | 28                                 | 90.00                  |
|           |                   | 4                                | 134                   | 0.95                         | 25                                 | 97.32                  |
|           |                   | 8                                | 155                   | 1.43                         | 18                                 | 112.28                 |
|           |                   | 12                               | 194                   | 1.57                         | 13                                 | 124.29                 |
|           |                   | 16                               | 137                   | 1.17                         | 10                                 | 135.00                 |
| AZO       | ZnO               | 0.0                              | 96                    | 1.10                         | 43                                 | 24.49                  |
|           |                   | 4                                | 103                   | 1.38                         | 36                                 | 123.69                 |
|           |                   | 8                                | 113                   | 1.57                         | 29                                 | 123.14                 |
|           |                   | 12                               | 107                   | 1.40                         | 25                                 | 127.29                 |
|           |                   | 16                               | 104                   | 1.30                         | 18                                 | 139.01                 |
| FTO       | ZnO               | 0.0                              | 62                    | 1.2                          | 100                                | 37.09                  |
|           |                   | 4                                | 83                    | 0.77                         | 54                                 | 117.29                 |
|           |                   | 8                                | 89                    | 1.2                          | 44                                 | 119.41                 |
|           |                   | 12                               | 104                   | 1.18                         | 37                                 | 126.00                 |
|           |                   | 16                               | 110                   | 2.00                         | 12                                 | 137.89                 |
| ITO       | ZnO               | 0.0                              | 70                    | 1.27                         | 75                                 | 23.86                  |
|           |                   | 4                                | 98                    | 0.88                         | 48                                 | 112.62                 |
|           |                   | 8                                | 102                   | 1.06                         | 42                                 | 116.71                 |
|           |                   | 12                               | 111                   | 1.20                         | 36                                 | 122.55                 |
|           |                   | 16                               | 140                   | 1.29                         | 4                                  | 142.12                 |
